# Supplementary material for: The Autism Biomarkers Consortium for Clinical Trials: Initial Evaluation of a Battery of Candidate EEG Biomarkers
Source: Atypon-hosted journal article supplement (doi:10.1176/appi.ajp.21050485), 2022-08-24
Supplement: ajp_21050485_correction01.pdf [file ajp_21050485_correction01.pdf]

## **Correction to Webb et al.**

After the article “The Autism Biomarkers Consortium for Clinical Trials: Initial Evaluation of a Battery of Candidate EEG Biomarkers,” by Sara Jane Webb, Ph.D., et al. (doi: 10.1176/appi.ajp.21050485) was published online on August 24, 2022, and appeared in the January 2023 issue, the authors wished to provide more information regarding the precision of the 6-week stability estimates by accompanying the intraclass correlation coefficients with 95% bootstrapped confidence intervals representing the degree of uncertainty in the estimate. These were added to Table S5 and an expanded version of Table 1 in the data supplement, which was reposted online on January 12, 2023.
